# Supplementary material for: An ENDOR and DFT analysis of hindered methyl group rotations in frozen solutions of bis(acetylacetonato)-copper(ii)
Source: Royal Society of Chemistry journal article supplement (doi:10.1039/c3cp52464g), 2013-01-01
Supplement: c3cp52464g.pdf [file c3cp52464g.pdf]

# **An ENDOR and DFT analysis of hindered methyl group rotations in frozen solutions of bis(acetylacetonato)-copper(II).**

Katherine Sharples, Emma Carter, Colan E. Hughes,

Kenneth D.M. Harris, James A. Platts, Damien M. Murphy.

*School of Chemistry, Cardiff University, Main Building Park Place, Cardiff CF10 3AT, UK.*

## **Electronic Supplementary Information**

| <b>Page</b> | <b>Content</b>                                                               |
|-------------|------------------------------------------------------------------------------|
| 2           | CW EPR spectra of “ <i>wet</i> ” and “ <i>dry</i> ” [Cu(acac) <sub>2</sub> ] |
| 3           | Q-band angular selective <sup>1</sup> H ENDOR (250 kHz RF modulation)        |
| 4           | DFT calculated relative energies as a function of dihedral angle             |
| 5-6         | DFT calculated hyperfine couplings as a function of rotation angle           |
| 7-10        | Atomic coordinates as a function of the methyl group rotation                |

### CW EPR spectra of “wet” and “dry” [Cu(acac)<sub>2</sub>]

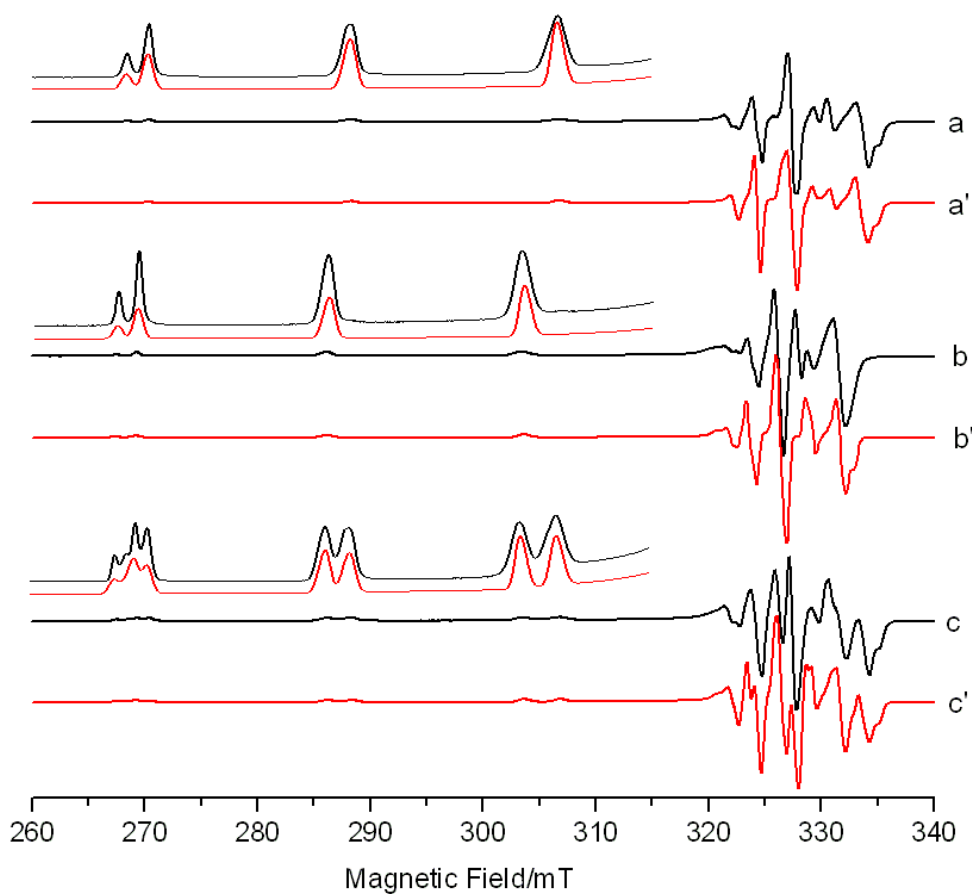

**Figure S1:** CW X-band EPR spectra of [Cu(acac)<sub>2</sub>] dissolved in CHCl<sub>3</sub>:C<sub>6</sub>H<sub>5</sub>CH<sub>3</sub> (2:3) under a) strict anhydrous conditions, b) under ‘wet’ conditions, and c) ‘mixed’ conditions (using ‘bench-top’ solvents). All spectra were recorded at 140 K. Experimental spectra (a-c; black trace), simulated spectra (a’-c’; red trace). An expanded view of the low field parallel regions are also shown. Spin Hamiltonian parameters are given in Table 1 (main paper).

### Q-band angular selective $^1\text{H}$ ENDOR (250 kHz RF modulation)

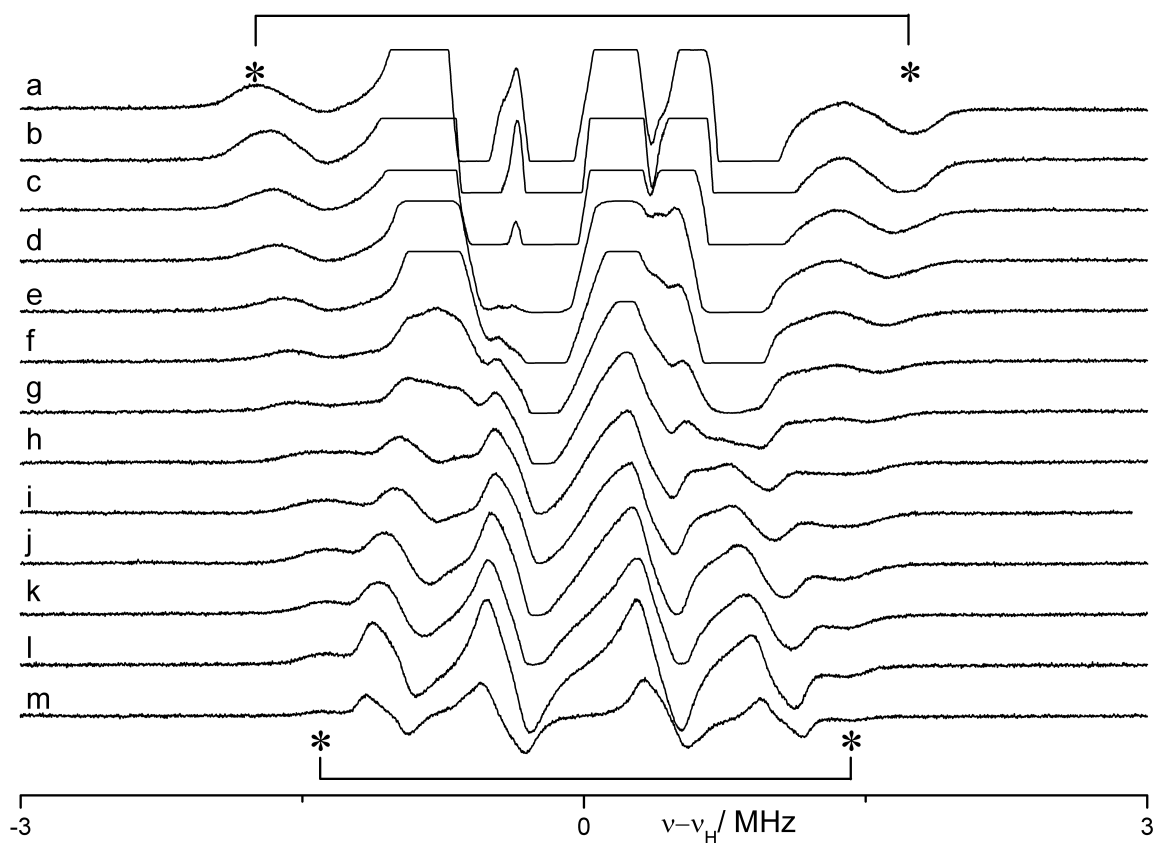

**Figure S2:** Angular selective  $^1\text{H}$  ENDOR spectra, recorded at 10 K and Q-band frequency, of  $[\text{Cu}(\text{acac})_2]$  recorded at 250 kHz RF modulation amplitude at different field positions (mT): (a) 1190.5 (b) 1186.2 (c) 1181.9 (d) 1176.6 (e) 1169.0 (f) 1160.6 (g) 1153.5 (h) 1139.4 (i) 1129.2 (j) 1113.7 (k) 1099.4 (l) 1072.4 and (m) 1046.8 mT. The peaks arising from the hindered rotational methyl groups (labelled \*) are more clearly visible at this increased RF modulation.

### DFT calculated relative energies as a function of dihedral angle

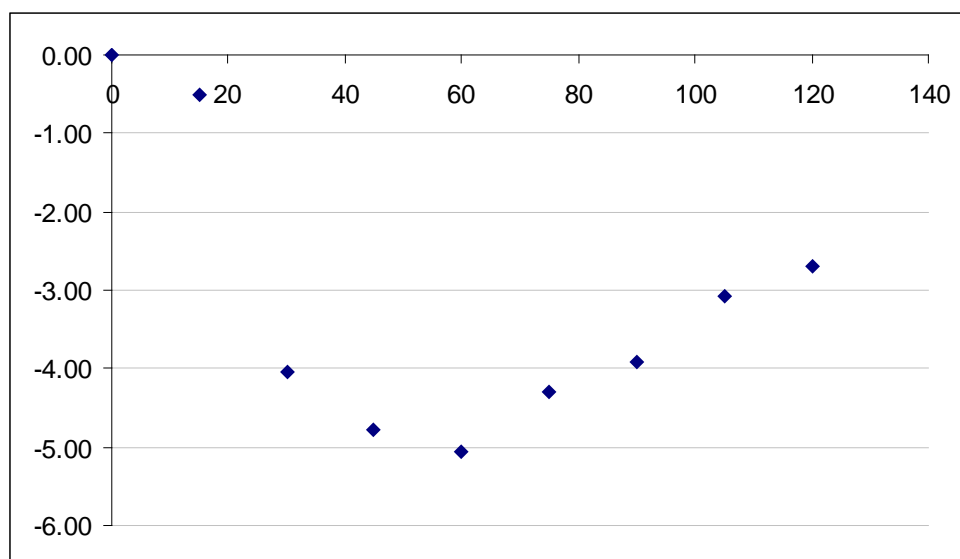

**Figure S3:** Relative DFT energies (Y-axis) as a function of dihedral angle (X-axis), defined as H-C-C-O, for the rotation of the methyl group.

### DFT calculated hyperfine couplings as a function of rotation angle

**Table S1:** DFT calculated hyperfine couplings for the **methyl group protons** in  $[\text{Cu}(\text{acac})_2]$ , as a function of the rotation angle. See main text for a definition of the rotation angle  $\theta$ .

| Rotation Angle | Atom | $\alpha$ | $\beta$ | $\gamma$ | $A_x$ | $A_y$ | $A_z$ | $a_{\text{iso}}$ |
|----------------|------|----------|---------|----------|-------|-------|-------|------------------|
| 0              | 8H   | -17.7    | 69.8    | -30.2    | -1.02 | -1.49 | 1.32  | -0.40            |
| 0              | 9H   | 1.8      | 87.4    | 30.5     | -2.11 | 1.89  | -1.29 | -0.50            |
| 0              | 10H  | 20.3     | 61.3    | 53       | -0.38 | 1.88  | -0.85 | 0.22             |
| 15             | 8H   | 12.9     | 22.3    | -47.1    | 0.9   | -1.99 | -1.54 | -0.88            |
| 15             | 9H   | -35.2    | 9.1     | 66.5     | -1.36 | 1.8   | -2.16 | -0.57            |
| 15             | 10H  | -42      | 74.9    | -23.6    | 0.26  | -0.22 | 2.45  | 0.83             |
| 30             | 8H   | -41.4    | 31.1    | 3        | 0.5   | -2.61 | -2.15 | -1.42            |
| 30             | 9H   | -30.5    | 24      | 61.3     | -1.68 | 1.37  | -2.37 | -0.89            |
| 30             | 10H  | 24.1     | 82.6    | -21.4    | 0.79  | 1.29  | 3.4   | 1.83             |
| 45             | 8H   | 36       | 39.2    | 13.5     | -2.71 | 0.54  | -2.21 | -1.46            |
| 45             | 9H   | -29.4    | 31.6    | 59.9     | -1.88 | 1.12  | -2.51 | -1.09            |
| 45             | 10H  | 14.1     | 85.7    | -21.2    | 1.13  | 1.64  | 3.73  | 2.17             |
| 60             | 8H   | -28.7    | 37.9    | 60.2     | -2    | 0.94  | -2.59 | -1.22            |
| 60             | 9H   | 29.5     | 45.1    | 19.4     | -2.7  | 0.64  | -2.19 | -1.42            |
| 60             | 10H  | 7.1      | 87.7    | -20.2    | 1.24  | 1.76  | 3.84  | 2.28             |
| 75             | 8H   | -30.5    | 32.3    | 62.2     | -1.85 | 1.14  | -2.48 | -1.06            |
| 75             | 9H   | 36.3     | 37.3    | 14.4     | -2.7  | 0.5   | -2.23 | -1.48            |
| 75             | 10H  | 13.9     | 84.7    | -19.8    | 1.1   | 1.61  | 3.7   | 2.14             |
| 90             | 8H   | 8.6      | 77      | 26.9     | -2.23 | 1.63  | -1.48 | -0.69            |
| 90             | 9H   | 5.4      | 67.6    | -40.1    | -1.89 | -2.33 | 0.63  | -1.20            |
| 90             | 10H  | 19.4     | 39.1    | 49.3     | 0.7   | 2.86  | 0.22  | 1.26             |
| 105            | 8H   | -34      | 9.1     | 60.3     | -1.36 | 1.77  | -2.16 | -0.58            |
| 105            | 9H   | 15.6     | 22.5    | -54.7    | 0.9   | -1.97 | -1.52 | -0.86            |
| 105            | 10H  | -22.1    | 43.8    | 77.6     | -0.32 | 2.34  | 0.15  | 0.72             |
| 120            | 8H   | -33.1    | 2.6     | 58.2     | -1.3  | 1.85  | -2.11 | -0.52            |
| 120            | 9H   | -29.3    | 72.1    | -32.6    | -0.48 | -0.95 | 1.77  | 0.11             |
| 120            | 10H  | 21.1     | 72      | 48       | -1    | 1.32  | -1.45 | -0.38            |

**Table S2:** DFT calculated hyperfine couplings for the **methine protons** in  $\text{Cu}(\text{acac})_2$ , as a function of the rotation angle. See main text for a definition of the rotation angle  $\theta$ .

| Rotation Angle | Atom | $\alpha$ | $\beta$ | $\gamma$ | $A_x$ | $A_y$ | $A_z$ | $a_{\text{iso}}$ |
|----------------|------|----------|---------|----------|-------|-------|-------|------------------|
| 0              | 16H  | -4.7     | 0.1     | 4.7      | 1.06  | -1.75 | 2.34  | 0.55             |
| 0              | 20H  | 0        | 89.9    | 0.1      | -2.35 | -1.75 | 1.06  | -1.01            |
| 15             | 16H  | 0.2      | 89.5    | 0.7      | -2.34 | -1.75 | 1.05  | -1.01            |
| 15             | 20H  | 31.3     | 0.2     | -30.6    | 1.05  | -1.75 | -2.35 | -1.02            |
| 30             | 16H  | 44.8     | 0.4     | -45.6    | 1.05  | -1.75 | -2.35 | -1.02            |
| 30             | 20H  | 0.2      | 90      | -0.8     | -2.36 | -1.75 | 1.05  | -1.02            |
| 45             | 16H  | 0.2      | 90      | -1.5     | -2.36 | -1.75 | 1.05  | -1.02            |

|     |     |       |      |      |       |       |       |       |
|-----|-----|-------|------|------|-------|-------|-------|-------|
| 45  | 20H | -7.6  | 0.4  | 6.1  | 1.05  | -1.75 | -2.36 | -1.02 |
| 60  | 16H | 0.1   | 90   | -0.8 | -2.36 | -1.75 | 1.05  | -1.02 |
| 60  | 20H | 0.4   | 90   | -0.8 | -2.36 | -1.75 | 1.05  | -1.02 |
| 75  | 16H | 0     | 89.5 | -0.2 | -2.36 | -1.75 | 1.05  | -1.02 |
| 75  | 20H | 0     | 89.8 | -0.2 | -2.36 | -1.75 | 1.05  | -1.02 |
| 90  | 16H | -43.8 | 0.3  | 40.8 | 1.05  | -1.75 | -2.35 | -1.02 |
| 90  | 20H | 0.1   | 89.9 | -2.9 | -2.35 | -1.75 | 1.05  | -1.02 |
| 105 | 16H | 0.1   | 89.8 | -4.3 | -2.35 | -1.75 | 1.05  | -1.02 |
| 105 | 20H | 0.2   | 90   | -4.2 | -2.36 | -1.75 | 1.05  | -1.02 |
| 120 | 16H | 0.1   | 90   | -5.4 | -2.35 | -1.75 | 1.05  | -1.02 |
| 120 | 20H | 0     | 90   | -5.2 | -2.35 | -1.75 | 1.05  | -1.02 |

**Table S3;** Atomic coordinates for [Cu(acac)<sub>2</sub>] as a function of the methyl group rotation.

|                           |           |           |           |                      |           |           |           |
|---------------------------|-----------|-----------|-----------|----------------------|-----------|-----------|-----------|
| <b>Dihedral Angle = 0</b> |           |           |           | <b>Dihedral = 15</b> |           |           |           |
| Cu                        | -0.002923 | 0.000075  | -0.002826 | Cu                   | -0.001929 | 0.000430  | 0.006133  |
| O                         | 1.336337  | -1.416569 | -0.002412 | O                    | 1.337444  | -1.415357 | -0.005246 |
| O                         | 1.336443  | 1.416668  | 0.003209  | O                    | 1.336914  | 1.418011  | 0.005621  |
| O                         | -1.344168 | 1.414147  | -0.001109 | O                    | -1.343348 | 1.413931  | 0.006176  |
| O                         | -1.344256 | -1.413923 | -0.003172 | O                    | -1.342655 | -1.413969 | 0.006470  |
| C                         | 2.605140  | -1.243354 | 0.001048  | C                    | 2.606272  | -1.241795 | -0.013267 |
| C                         | 2.605213  | 1.243314  | 0.004046  | C                    | 2.605444  | 1.245005  | -0.009014 |
| C                         | 3.437986  | -2.511993 | 0.003202  | C                    | 3.437284  | -2.510873 | 0.001831  |
| H                         | 4.087166  | -2.544299 | 0.891579  | H                    | 3.849556  | -2.670141 | 1.010897  |
| H                         | 2.780525  | -3.388980 | 0.001340  | H                    | 2.805010  | -3.370397 | -0.249925 |
| H                         | 4.090909  | -2.544457 | -0.882117 | H                    | 4.281138  | -2.445029 | -0.698447 |
| C                         | 3.438240  | 2.511804  | 0.005860  | C                    | 3.438474  | 2.513305  | -0.011627 |
| H                         | 2.781093  | 3.388947  | 0.018022  | H                    | 2.781601  | 3.390713  | -0.012930 |
| H                         | 4.098094  | 2.537780  | 0.886345  | H                    | 4.089189  | 2.547023  | 0.875455  |
| H                         | 4.080549  | 2.550462  | -0.887166 | H                    | 4.090081  | 2.543796  | -0.898028 |
| C                         | 3.261872  | -0.000046 | 0.003591  | C                    | 3.262437  | 0.001501  | -0.022463 |
| H                         | 4.352818  | -0.000080 | 0.006208  | H                    | 4.352953  | 0.002325  | -0.035889 |
| C                         | -2.613301 | -1.243073 | -0.004030 | C                    | -2.611753 | -1.243594 | 0.005448  |
| C                         | -2.613223 | 1.243375  | -0.002464 | C                    | -2.612380 | 1.242904  | 0.004369  |
| C                         | -3.272566 | 0.000172  | -0.003742 | C                    | -3.271340 | -0.000503 | 0.005074  |
| H                         | -4.361777 | 0.000207  | -0.004285 | H                    | -4.360727 | -0.000774 | 0.004516  |
| C                         | -3.426669 | -2.520260 | -0.005532 | C                    | -3.424652 | -2.521069 | 0.005027  |
| H                         | -3.167239 | -3.115730 | -0.893831 | H                    | -3.170162 | -3.113634 | -0.886712 |
| H                         | -3.159610 | -3.122944 | 0.875512  | H                    | -3.152114 | -3.126461 | 0.882475  |
| H                         | -4.506369 | -2.326219 | -0.000445 | H                    | -4.504379 | -2.327574 | 0.016740  |
| C                         | -3.426517 | 2.520613  | -0.002476 | C                    | -3.425975 | 2.519929  | 0.001802  |
| H                         | -3.160012 | 3.121902  | 0.879696  | H                    | -3.155702 | 3.125723  | 0.879685  |
| H                         | -3.166441 | 3.117464  | -0.889658 | H                    | -3.169978 | 3.112394  | -0.889564 |
| H                         | -4.506228 | 2.326625  | 0.001603  | H                    | -4.505615 | 2.325806  | 0.011387  |
| <b>Dihedral = 30</b>      |           |           |           | <b>Dihedral = 45</b> |           |           |           |
| Cu                        | 0.005168  | 0.000410  | -0.001610 | Cu                   | 0.006843  | 0.000462  | 0.000306  |
| O                         | 1.344180  | -1.416833 | -0.040895 | O                    | 1.347157  | -1.415193 | -0.036009 |
| O                         | 1.347101  | 1.411871  | -0.005798 | O                    | 1.347875  | 1.413015  | -0.019500 |
| O                         | -1.335033 | 1.414952  | 0.035211  | O                    | -1.333737 | 1.415278  | 0.038355  |
| O                         | -1.336085 | -1.412711 | 0.002822  | O                    | -1.333739 | -1.413271 | 0.011121  |
| C                         | 2.612559  | -1.247224 | -0.058943 | C                    | 2.615898  | -1.244151 | -0.054558 |
| C                         | 2.616234  | 1.238994  | -0.034173 | C                    | 2.616611  | 1.241997  | -0.044667 |
| C                         | 3.433283  | -2.520956 | -0.052694 | C                    | 3.431325  | -2.520211 | -0.051215 |
| H                         | 3.604073  | -2.834118 | 0.990338  | H                    | 3.362920  | -2.986933 | 0.944582  |
| H                         | 2.876727  | -3.324460 | -0.551655 | H                    | 3.003169  | -3.232778 | -0.770008 |
| H                         | 4.411891  | -2.381053 | -0.530203 | H                    | 4.488293  | -2.339198 | -0.285292 |
| C                         | 3.430855  | 2.515477  | -0.035479 | C                    | 3.431175  | 2.518829  | -0.052902 |
| H                         | 3.152593  | 3.124220  | -0.908838 | H                    | 3.154524  | 3.120400  | -0.931696 |
| H                         | 3.184828  | 3.105422  | 0.860142  | H                    | 3.183943  | 3.114469  | 0.838248  |
| H                         | 4.510124  | 2.320050  | -0.057341 | H                    | 4.510845  | 2.323740  | -0.071761 |
| C                         | 3.272966  | -0.003937 | -0.064155 | C                    | 3.275268  | -0.001060 | -0.064625 |
| H                         | 4.362243  | -0.006237 | -0.088895 | H                    | 4.364144  | -0.001172 | -0.091587 |
| C                         | -2.605027 | -1.241771 | 0.019528  | C                    | -2.602593 | -1.242414 | 0.030879  |
| C                         | -2.603998 | 1.244464  | 0.049076  | C                    | -2.602517 | 1.244031  | 0.054410  |
| C                         | -3.263758 | 0.001463  | 0.042102  | C                    | -3.261776 | 0.000672  | 0.050516  |
| H                         | -4.352949 | 0.001716  | 0.055072  | H                    | -4.350910 | 0.000380  | 0.063782  |
| C                         | -3.418517 | -2.518846 | 0.014175  | C                    | -3.415909 | -2.519697 | 0.029227  |
| H                         | -3.161426 | -3.110479 | -0.877230 | H                    | -3.157340 | -3.115382 | -0.858936 |
| H                         | -3.149213 | -3.125351 | 0.891952  | H                    | -3.147826 | -3.122001 | 0.910368  |
| H                         | -4.498135 | -2.324784 | 0.023579  | H                    | -4.495573 | -2.325817 | 0.036638  |
| C                         | -3.416761 | 2.521778  | 0.075220  | C                    | -3.415984 | 2.520956  | 0.076572  |
| H                         | -3.140131 | 3.111025  | 0.962387  | H                    | -3.132698 | 3.118608  | 0.955933  |
| H                         | -3.166303 | 3.130493  | -0.806579 | H                    | -3.172946 | 3.121370  | -0.812901 |
| H                         | -4.496401 | 2.328054  | 0.088881  | H                    | -4.495355 | 2.326696  | 0.100714  |

|                      |           |           |           |                       |           |           |           |
|----------------------|-----------|-----------|-----------|-----------------------|-----------|-----------|-----------|
| <b>Dihedral = 60</b> |           |           |           | <b>Dihedral = 75</b>  |           |           |           |
| Cu                   | 0.007740  | 0.000710  | -0.002008 | Cu                    | 0.005373  | -0.001608 | -0.003644 |
| O                    | 1.347782  | -1.413432 | -0.031293 | O                     | 1.345481  | -1.415953 | -0.025501 |
| O                    | 1.348695  | 1.414407  | -0.024366 | O                     | 1.346545  | 1.411259  | -0.037264 |
| O                    | -1.333216 | 1.414191  | 0.021759  | O                     | -1.333567 | 1.413626  | 0.019399  |
| O                    | -1.333060 | -1.413255 | 0.026607  | O                     | -1.336008 | -1.414052 | 0.032374  |
| C                    | 2.616774  | -1.243256 | -0.048654 | C                     | 2.614822  | -1.246912 | -0.058941 |
| C                    | 2.617487  | 1.243097  | -0.042193 | C                     | 2.615251  | 1.239790  | -0.056720 |
| C                    | 3.429141  | -2.520864 | -0.069069 | C                     | 3.428154  | -2.523425 | -0.060098 |
| H                    | 3.157899  | -3.138602 | 0.800017  | H                     | 3.028409  | -3.231487 | 0.678176  |
| H                    | 3.172780  | -3.100188 | -0.968934 | H                     | 3.373433  | -2.991265 | -1.056666 |
| H                    | 4.508618  | -2.327309 | -0.058482 | H                     | 4.488080  | -2.327033 | 0.150099  |
| C                    | 3.431236  | 2.519993  | -0.053014 | C                     | 3.428870  | 2.516815  | -0.063997 |
| H                    | 3.157976  | 3.117408  | -0.935825 | H                     | 3.152709  | 3.121352  | -0.940703 |
| H                    | 3.179057  | 3.120507  | 0.833679  | H                     | 3.178156  | 3.112651  | 0.827128  |
| H                    | 4.510985  | 2.325784  | -0.066196 | H                     | 4.507638  | 2.321679  | -0.077520 |
| C                    | 3.276384  | -0.000310 | -0.053298 | C                     | 3.273882  | -0.003546 | -0.066750 |
| H                    | 4.365478  | 0.000126  | -0.068803 | H                     | 4.363199  | -0.004987 | -0.079622 |
| C                    | -2.601922 | -1.242866 | 0.048567  | C                     | -2.604528 | -1.242073 | 0.057324  |
| C                    | -2.602123 | 1.243443  | 0.043853  | C                     | -2.602670 | 1.244448  | 0.048593  |
| C                    | -3.261292 | 0.000240  | 0.057748  | C                     | -3.262573 | 0.002008  | 0.067469  |
| H                    | -4.350348 | 0.000157  | 0.077716  | H                     | -4.351603 | 0.003601  | 0.087343  |
| C                    | -3.414642 | -2.520300 | 0.066089  | C                     | -3.418855 | -2.518473 | 0.080543  |
| H                    | -3.158788 | -3.126478 | -0.815763 | H                     | -3.169495 | -3.125914 | -0.802465 |
| H                    | -3.143384 | -3.112053 | 0.953401  | H                     | -3.142589 | -3.109597 | 0.966356  |
| H                    | -4.494352 | -2.326710 | 0.074595  | H                     | -4.498249 | -2.323568 | 0.095463  |
| C                    | -3.415204 | 2.520759  | 0.056078  | C                     | -3.414214 | 2.522413  | 0.053268  |
| H                    | -3.128405 | 3.127187  | 0.928207  | H                     | -3.126572 | 3.131203  | 0.923516  |
| H                    | -3.175694 | 3.112282  | -0.840399 | H                     | -3.174537 | 3.111436  | -0.844932 |
| H                    | -4.494515 | 2.326960  | 0.085975  | H                     | -4.493454 | 2.329237  | 0.083770  |
| <b>Dihedral = 90</b> |           |           |           | <b>Dihedral = 105</b> |           |           |           |
| Cu                   | 0.004789  | -0.000165 | 0.006261  | Cu                    | 0.002676  | -0.000199 | 0.001963  |
| O                    | 0.343999  | -1.418078 | 0.000324  | O                     | 1.340930  | -1.420256 | -0.004768 |
| O                    | 1.346157  | 1.410933  | -0.037376 | O                     | 1.344659  | 1.409313  | -0.051601 |
| O                    | 1.335337  | 1.415017  | 0.018517  | O                     | -1.336614 | 1.415786  | 0.019984  |
| O                    | 1.336516  | -1.412532 | 0.045971  | O                     | -1.338755 | -1.412142 | 0.047925  |
| C                    | 2.612086  | -1.248819 | -0.030509 | C                     | 2.608577  | -1.251928 | -0.036409 |
| C                    | 2.615478  | 1.237362  | -0.057876 | C                     | 2.614216  | 1.234259  | -0.074612 |
| C                    | 3.432850  | -2.522110 | -0.066957 | C                     | 3.436152  | -2.522812 | -0.056648 |
| H                    | 2.885024  | -3.334238 | 0.426999  | H                     | 2.811118  | -3.380584 | 0.218030  |
| H                    | 3.602256  | -2.814303 | -1.116193 | H                     | 3.838851  | -2.688026 | -1.068768 |
| H                    | 4.414945  | -2.385585 | 0.405111  | H                     | 4.292150  | -2.448193 | 0.629229  |
| C                    | 3.429886  | 2.513615  | -0.088275 | C                     | 3.429242  | 2.509947  | -0.111564 |
| H                    | 3.150682  | 3.102333  | -0.974980 | H                     | 3.146039  | 3.097513  | -0.997750 |
| H                    | 3.184258  | 3.123657  | 0.793930  | H                     | 3.188431  | 3.121705  | 0.770821  |
| H                    | 4.509189  | 2.318146  | -0.106391 | H                     | 4.508323  | 2.313695  | -0.134770 |
| C                    | 3.272440  | -0.005588 | -0.051737 | C                     | 3.269622  | -0.008636 | -0.065601 |
| H                    | 4.361921  | -0.008287 | -0.068877 | H                     | 4.359303  | -0.013425 | -0.085692 |
| C                    | -2.605401 | -1.241062 | 0.069059  | C                     | -2.607466 | -1.240203 | 0.073938  |
| C                    | -2.604130 | 1.245246  | 0.046126  | C                     | -2.605360 | 1.246180  | 0.052081  |
| C                    | -3.263914 | 0.002416  | 0.070572  | C                     | -3.265468 | 0.003594  | 0.077810  |
| H                    | -4.352978 | 0.003050  | 0.092374  | H                     | -4.354446 | 0.004703  | 0.102839  |
| C                    | -3.418661 | -2.517911 | 0.097870  | C                     | -3.421443 | -2.516628 | 0.103538  |
| H                    | -3.166858 | -3.129664 | -0.781367 | H                     | -3.174775 | -3.126154 | -0.778720 |
| H                    | -3.143975 | -3.104324 | 0.987583  | H                     | -3.142439 | -3.105592 | 0.990191  |
| H                    | -4.498263 | -2.323797 | 0.109560  | H                     | -4.500817 | -2.321719 | 0.121229  |
| C                    | -3.416621 | 2.522985  | 0.051089  | C                     | -3.417419 | 2.524174  | 0.061797  |
| H                    | -3.133717 | 3.130555  | 0.923793  | H                     | -3.134330 | 3.128357  | 0.936844  |
| H                    | -3.172376 | 3.113070  | -0.845012 | H                     | -3.172839 | 3.117588  | -0.831976 |
| H                    | -4.496129 | 2.329704  | 0.076409  | H                     | -4.497030 | 2.331312  | 0.086657  |



| Dihedral = 120 |           |           |           |
|----------------|-----------|-----------|-----------|
| Cu             | 0.002452  | 0.000279  | -0.003081 |
| O              | 1.338964  | -1.423039 | -0.021040 |
| O              | 1.344014  | 1.408321  | -0.053564 |
| O              | -1.338060 | 1.416179  | 0.014780  |
| O              | -1.339987 | -1.410473 | 0.047384  |
| C              | 2.606122  | -1.254650 | -0.054964 |
| C              | 2.613711  | 1.231631  | -0.082470 |
| C              | 3.437635  | -2.522509 | -0.061756 |
| H              | 2.783143  | -3.400441 | -0.024482 |
| H              | 4.055955  | -2.568813 | -0.971331 |
| H              | 4.123362  | -2.535932 | 0.798784  |
| C              | 3.429267  | 2.506977  | -0.116549 |
| H              | 3.145189  | 3.097237  | -1.000669 |
| H              | 3.189835  | 3.116039  | 0.768100  |
| H              | 4.508351  | 2.310450  | -0.141077 |
| C              | 3.267583  | -0.011184 | -0.084886 |
| H              | 4.357347  | -0.017172 | -0.112019 |
| C              | -2.608423 | -1.238768 | 0.084231  |
| C              | -2.606567 | 1.247210  | 0.051804  |
| C              | -3.266848 | 0.004731  | 0.087371  |
| H              | -4.355593 | 0.005754  | 0.118709  |
| C              | -3.421567 | -2.515448 | 0.124987  |
| H              | -3.189041 | -3.123469 | -0.762186 |
| H              | -3.128264 | -3.105852 | 1.006004  |
| H              | -4.500585 | -2.320905 | 0.159804  |
| C              | -3.418697 | 2.525214  | 0.055794  |
| H              | -3.131336 | 3.136246  | 0.924702  |
| H              | -3.178761 | 3.111702  | -0.843791 |
| H              | -4.498114 | 2.332312  | 0.087406  |
